# Supplementary material
Source: PubMed Central journal article supplement (PMC9106763)
Supplement: NIHMS1752852-supplement-2.pdf [file NIHMS1752852-supplement-2.pdf]

**Supplementary figure S1. Study consort diagram**

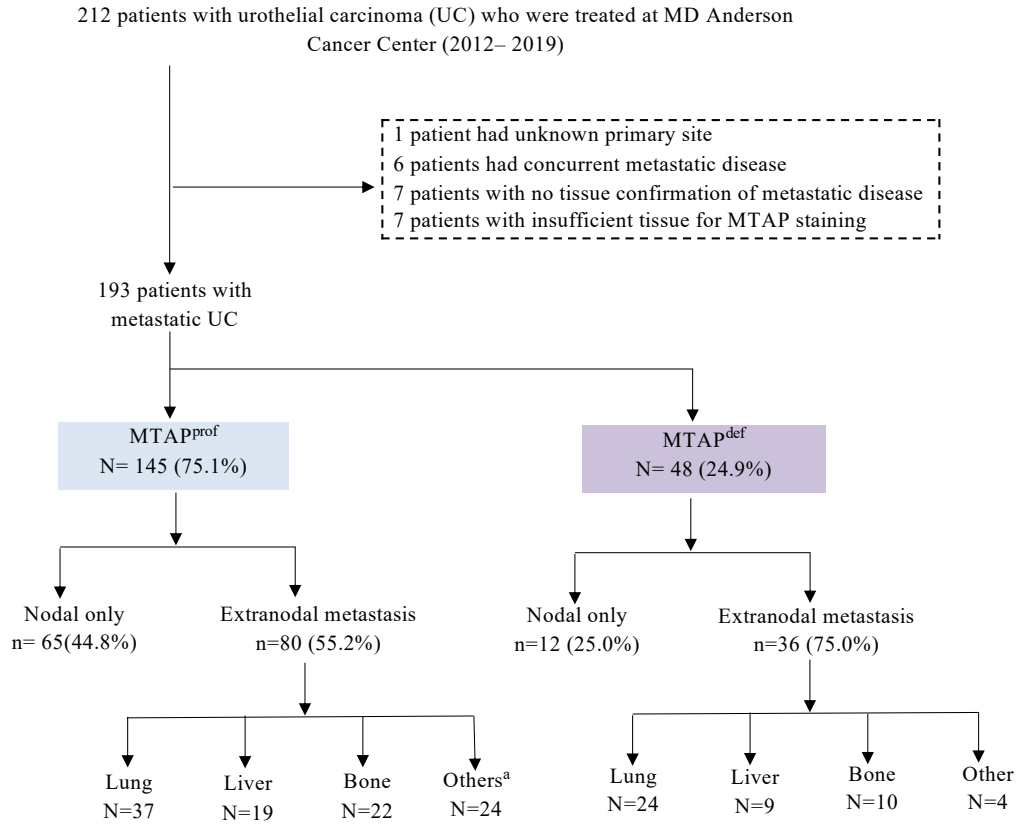

<sup>a</sup> Other site of metastases includes: Peritoneum, adrenals, brain<sup>b</sup>, rectal wall, and abdominal wall.

<sup>b</sup> Brain baseline imaging with either MRI or CT was available for 107 patients.

Abbreviations: UC: urothelial cancer; MTAP<sup>prof</sup>: MTAP-proficient; MTAP<sup>def</sup>: MTAP-deficient.
