# Supplementary material
Source: PubMed Central journal article supplement (PMC9106763)

# Supplementary figure S4. Metastatic sites and mutational profile based on the MTAP status for mUC patients

A.

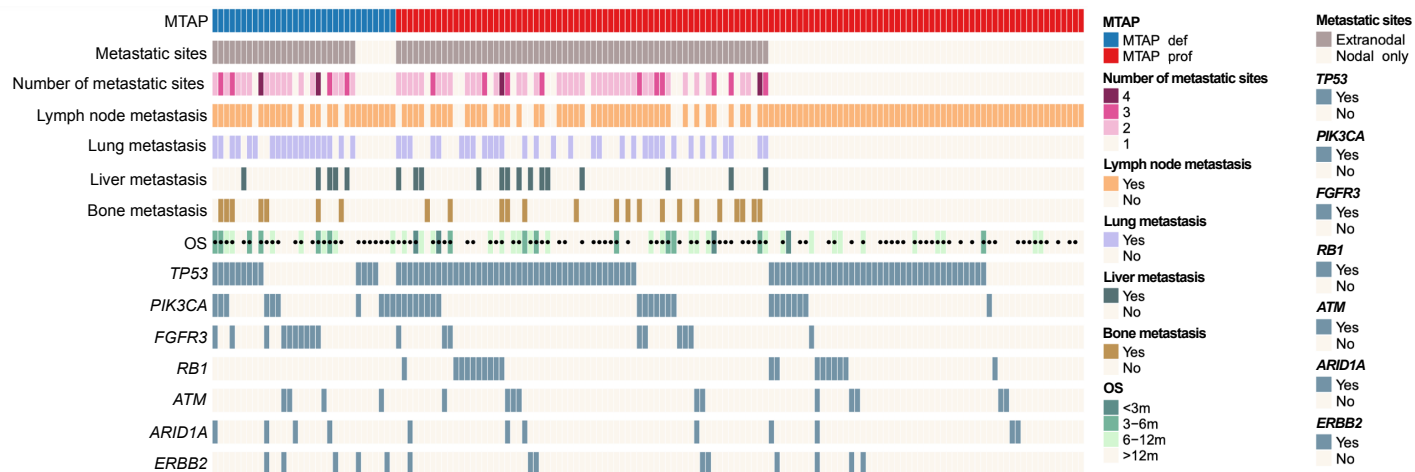

Supplement: NIHMS1752852-supplement-5.pdf [file NIHMS1752852-supplement-5.pdf]
