# Supplementary material
Source: PubMed Central journal article supplement (PMC9106763)

# Supplementary figure S5. Type of *FGFR* alteration and its oncogenic significance in relation to MTAP IHC status

A

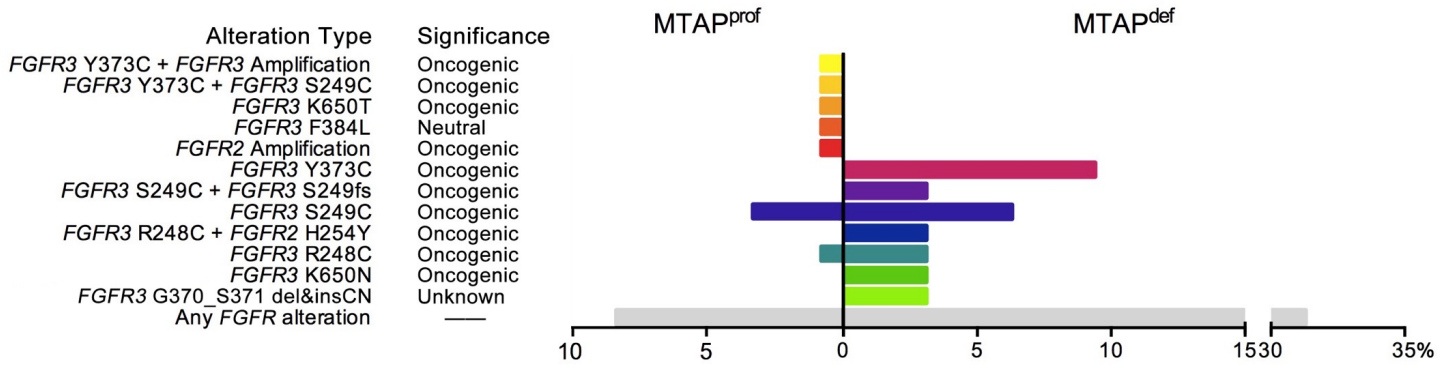

Supplement: NIHMS1752852-supplement-6.pdf [file NIHMS1752852-supplement-6.pdf]
