# Supplementary material
Source: PubMed Central journal article supplement (PMC9106763)

# Supplementary figure S6. Proposed hypothesis of the roles of various genomic alterations, particularly 9p21 loss, in metastatic urothelial cancer development

A

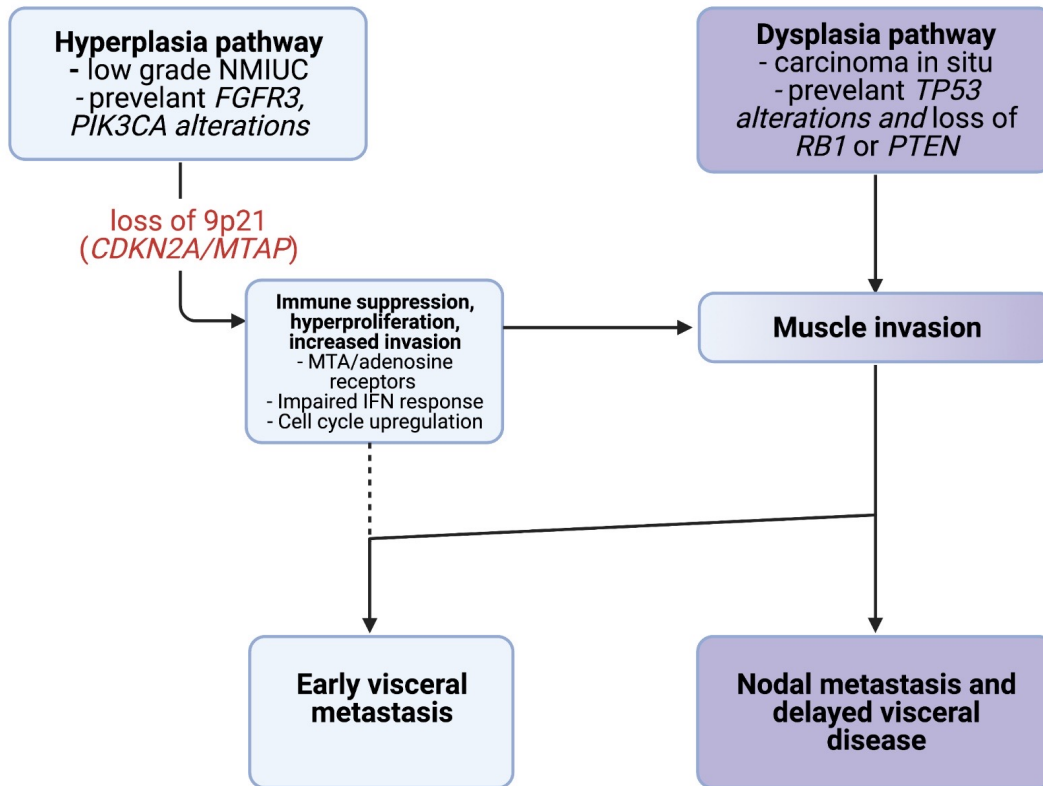

Supplement: NIHMS1752852-supplement-7.pdf [file NIHMS1752852-supplement-7.pdf]
