# Supplementary material
Source: PubMed Central journal article supplement (PMC9106763)

**Supplementary figure S2. Sankey diagram for the lines of therapy (up to 4 lines)**

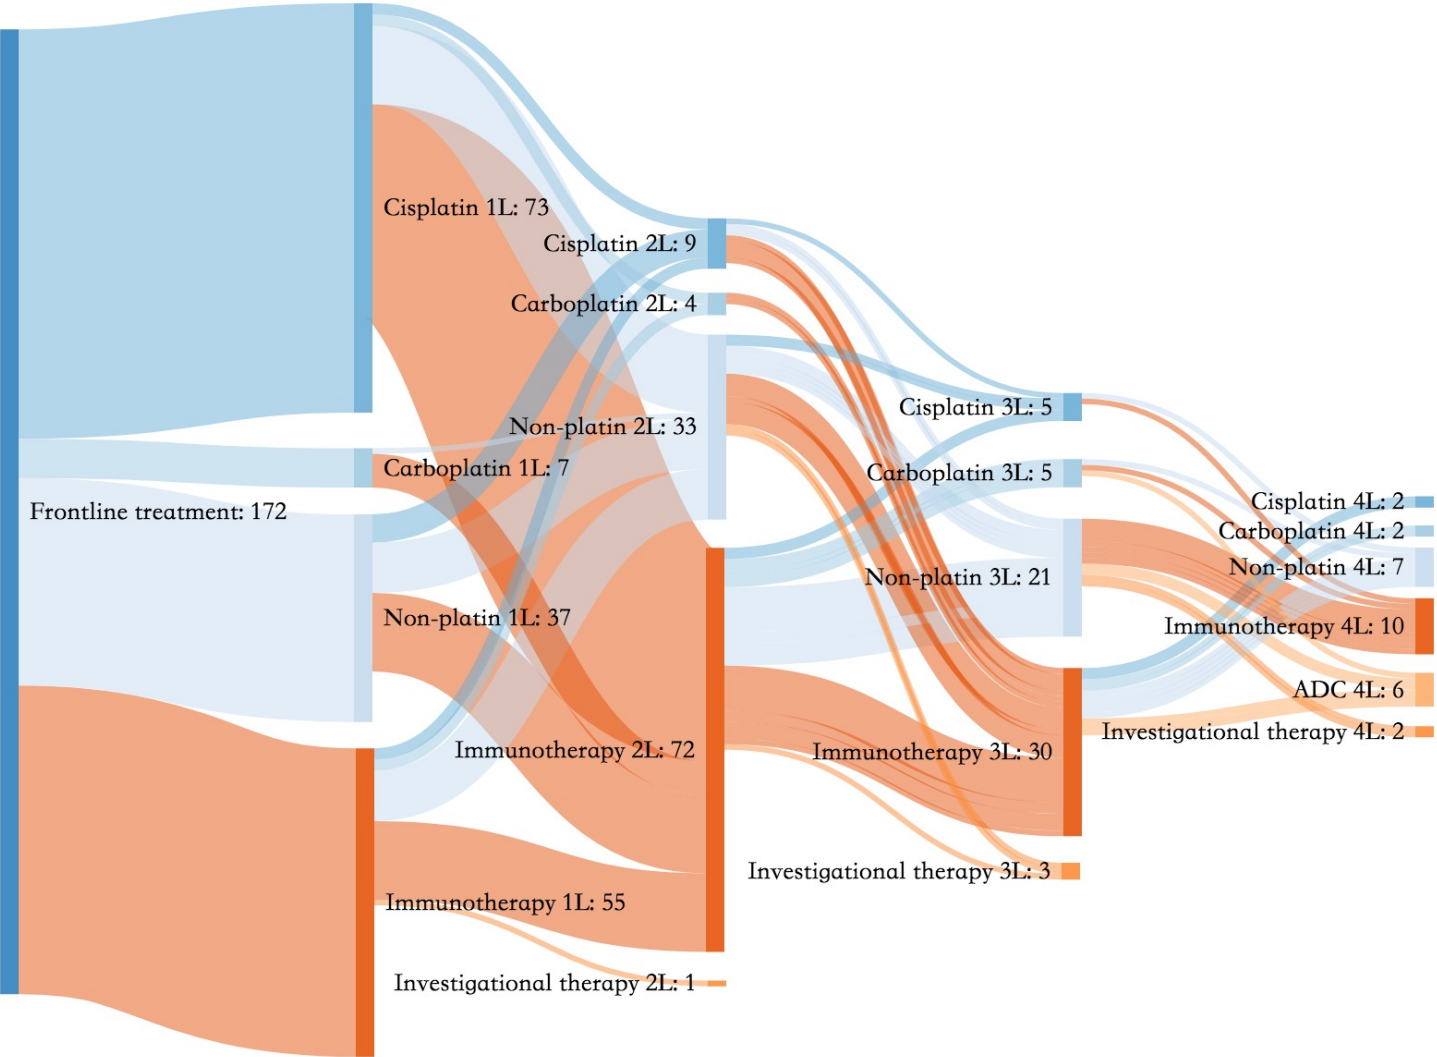

Supplement: NIHMS1752852-supplement-3.pdf [file NIHMS1752852-supplement-3.pdf]

### Supplementary figure S3. MTAP<sup>def</sup> was associated with poor OS and PFS

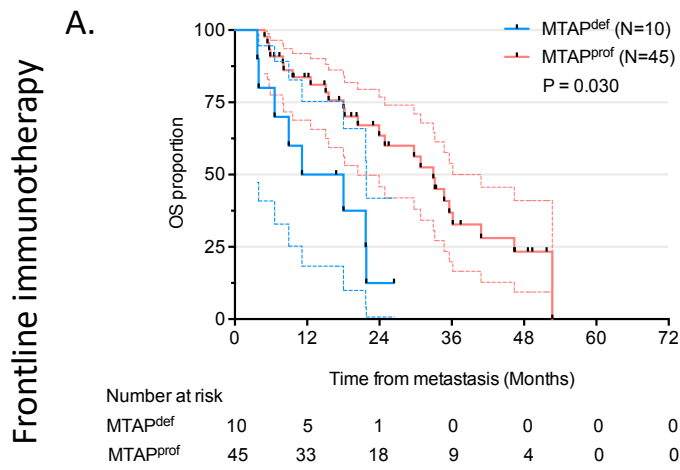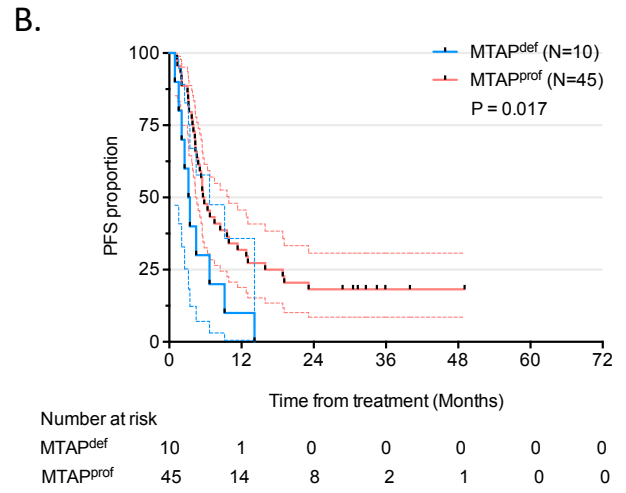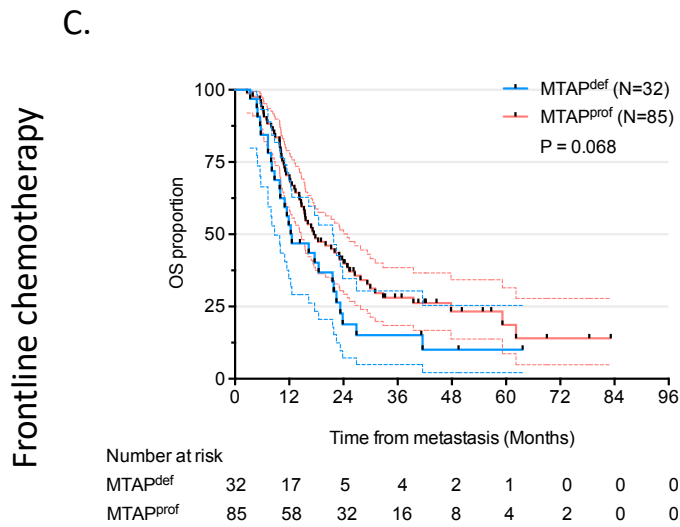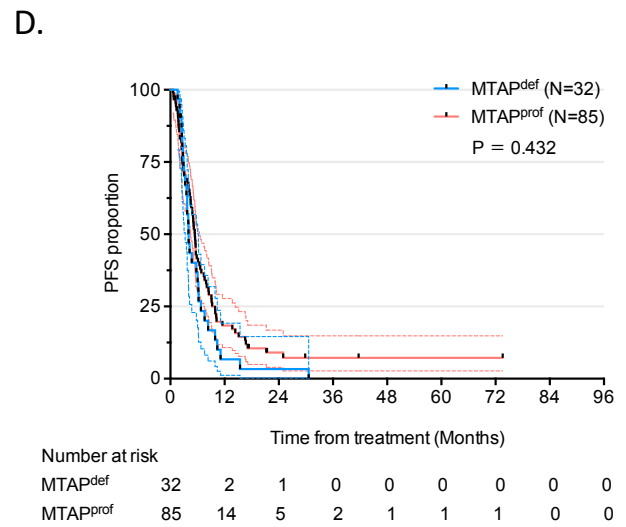

Supplement: NIHMS1752852-supplement-4.pdf [file NIHMS1752852-supplement-4.pdf]
